# Supplementary material for: The use of technical replication for detection of low-level somatic mutations in next-generation sequencing
Source: PubMed Central journal article supplement (PMC6400950; doi:10.1038/s41467-019-09026-y), 2019-03-05
Supplement: 41467_2019_9026_MOESM2_ESM.pdf [file 41467_2019_9026_MOESM2_ESM.pdf]

1 **Description of Additional Supplementary Files**

2

3 **File Name: Supplementary Data 1**

4 **Description:** Designed target regions per sequencing platform for the analysis of test-base genome

5

6 **File Name: Supplementary Data 2**

7 **Description:** Platform-specific answer sets of test-base genome

8

9 **File Name: Supplementary Data 3**

10 **Description:** Target regions of two cancer panels for the analysis of reference standard

11

12 **File Name: Supplementary Data 4**

13 **Description:** Variant information of the reference standard and observed allele frequencies in the  
14 sequencing data

15
